# Supplementary material for: The PMIP4 contribution to CMIP6 – Part 3: The last millennium, scientific objective, and experimental design for the PMIP4 past1000 simulations
Source: Copernicus journal article supplement (doi:10.5194/gmd-10-4005-2017), 2017-11-07
Supplement: Supplementary file 1 [file gmd-10-4005-2017-supplement.zip]

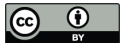

## *Supplement of*

# **The PMIP4 contribution to CMIP6 – Part 3: The last millennium, scientific objective, and experimental design for the PMIP4 *past1000* simulations**

**Johann H. Jungclaus et al.**

*Correspondence to:* Johann H. Jungclaus ([johann.jungclaus@mpimet.mpg.de](mailto:johann.jungclaus@mpimet.mpg.de))

- [gmd-10-4005-2017-supplement-title-page.pdf](#)
- [CMIP6\\_MIP\\_tables\\_1.00.12.xlsx](#)

The copyright of individual parts of the supplement might differ from the CC BY 3.0 License.
